# Supplementary material
Source: HighWire-hosted journal article supplement (https://bmjopenrespres.bmj.com/content/9/1/e001400)
Supplement: inline-supplementary-material-1 [file inline-supplementary-material-1.pdf]

**Table E1: Summary of amendments**

| Amend-<br>ment<br>number                                                            | Protocol<br>version | Month/<br>year | Changes                                                                                                                                                                                                                                                                                                                                                                                                                                                                                                                                                                                                                                                              |
|-------------------------------------------------------------------------------------|---------------------|----------------|----------------------------------------------------------------------------------------------------------------------------------------------------------------------------------------------------------------------------------------------------------------------------------------------------------------------------------------------------------------------------------------------------------------------------------------------------------------------------------------------------------------------------------------------------------------------------------------------------------------------------------------------------------------------|
|                                                                                     | 1.0                 | Apr-2019       |                                                                                                                                                                                                                                                                                                                                                                                                                                                                                                                                                                                                                                                                      |
|                                                                                     | 2.0                 | Jun-2019       | Resubmission (no major changes)                                                                                                                                                                                                                                                                                                                                                                                                                                                                                                                                                                                                                                      |
| 1                                                                                   | 3.0                 | Jul-2019       | Sponsor changed from University Medical Center Groningen to Leiden University Medical Center                                                                                                                                                                                                                                                                                                                                                                                                                                                                                                                                                                         |
| Start recruitment practices (August 2019)                                           |                     |                |                                                                                                                                                                                                                                                                                                                                                                                                                                                                                                                                                                                                                                                                      |
| 2                                                                                   | 4.0                 | Oct-2019       | <ul style="list-style-type: none"> <li>- Location of where consent forms will be saved added to patient information.</li> <li>- Randomisation will proceed via Castor EDC instead of sealed envelopes</li> <li>- Only adverse events related to asthma, asthma medication or investigational product will be inquired and documented.</li> </ul>                                                                                                                                                                                                                                                                                                                     |
| First patient enrolled and first cluster randomised (16 December 2019)              |                     |                |                                                                                                                                                                                                                                                                                                                                                                                                                                                                                                                                                                                                                                                                      |
| Recruitment and inclusion paused from March to August 2020 due to COVID-19 pandemic |                     |                |                                                                                                                                                                                                                                                                                                                                                                                                                                                                                                                                                                                                                                                                      |
| 3                                                                                   | 5.0                 | May-2020       | <ul style="list-style-type: none"> <li>- Expansion of recruitment area to the whole country</li> <li>- Inclusion criterion 'patients should receive asthma treatment in primary care' was removed. In this way, patients with higher symptom burden are able to participate, which increases the reach and enhances the recruitment rate. Also, patients that receive treatment from a pulmonologist will still visit their general practitioner during exacerbations or between pulmonologist consultations.</li> <li>- Participants will be financially compensated for their participation with gift vouchers, to promote participation and retention.</li> </ul> |
| 4                                                                                   | 6.0                 | Jul-2020       | <ul style="list-style-type: none"> <li>- Replacement of home visits by remote visits, in order to proceed with study inclusion during the covid-pandemic.</li> <li>- Replacement of face-to-face instructions about the intervention portal for health care professionals to remote instructions.</li> </ul>                                                                                                                                                                                                                                                                                                                                                         |
| Restart recruitment and inclusion (September 2020)                                  |                     |                |                                                                                                                                                                                                                                                                                                                                                                                                                                                                                                                                                                                                                                                                      |
| 5                                                                                   | 7.0                 | Jan-2021       | - Broaden recruitment strategy with recruitment via public channels (general practitioner can choose how to participate)                                                                                                                                                                                                                                                                                                                                                                                                                                                                                                                                             |
| 6                                                                                   | 8.0                 | Aug-2021       | <ul style="list-style-type: none"> <li>- Broaden recruitment strategy with recruitment via pharmacies. Due to this change, patients will be included based on a self-reported diagnosis of asthma. The diagnosis will be checked at study end by the general practice.</li> <li>- Possibility added to electronically sign the informed consent form using DocuSign®.</li> </ul>                                                                                                                                                                                                                                                                                     |
